# Supplementary material for: Effect of antibiotic pre-treatment and pathogen challenge on the intestinal microbiota in mice
Source: PubMed Central journal article supplement (PMC5116224; doi:10.1186/s13099-016-0143-z), 2016-11-18
Supplement: 13099_2016_143_MOESM1_ESM.pdf [file 13099_2016_143_MOESM1_ESM.pdf]

## Supplemental Figures

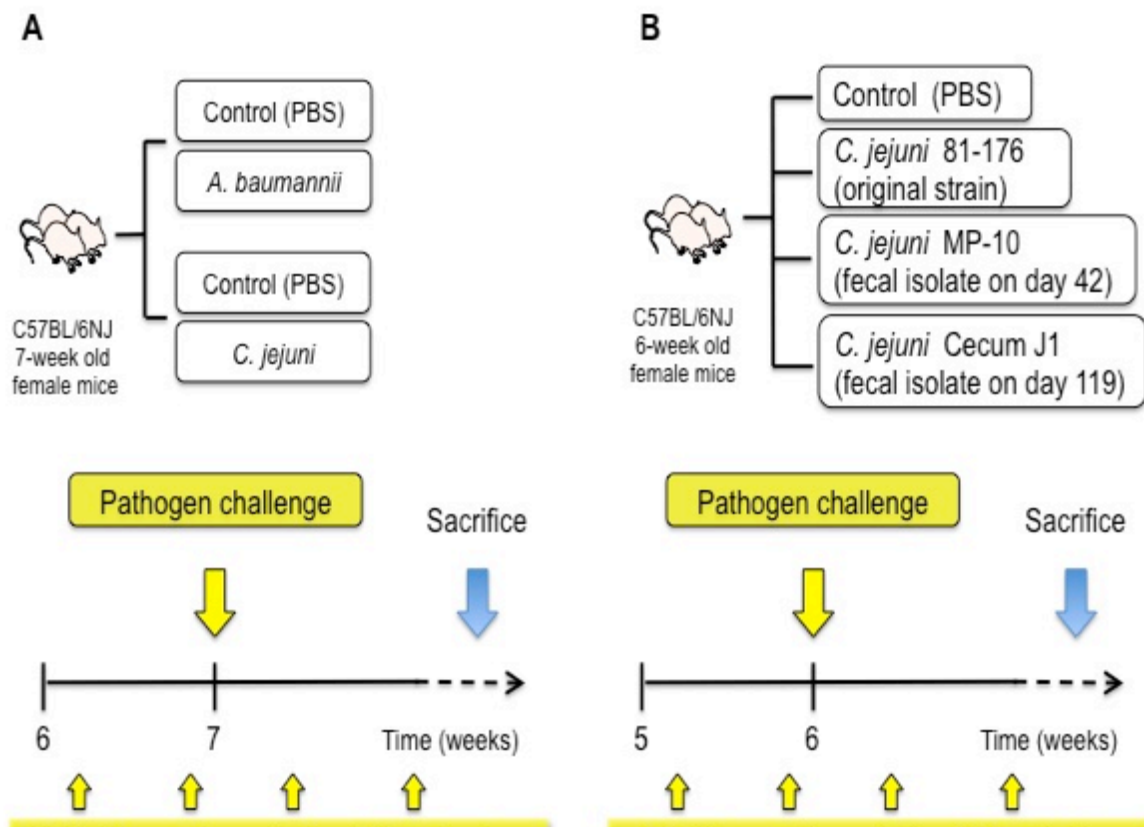

**Figure S1. Experimental design for assessment of intestinal colonization of mice.**

**Panel A:** C57BL/6 NJ mice were orally inoculated at 7 weeks of age with *A. baumannii* or *C. jejuni*. **Panel B:** C57BL/6 NJ mice were orally inoculated at 6 weeks of age with one of three *C. jejuni* strains that differed in passage history.

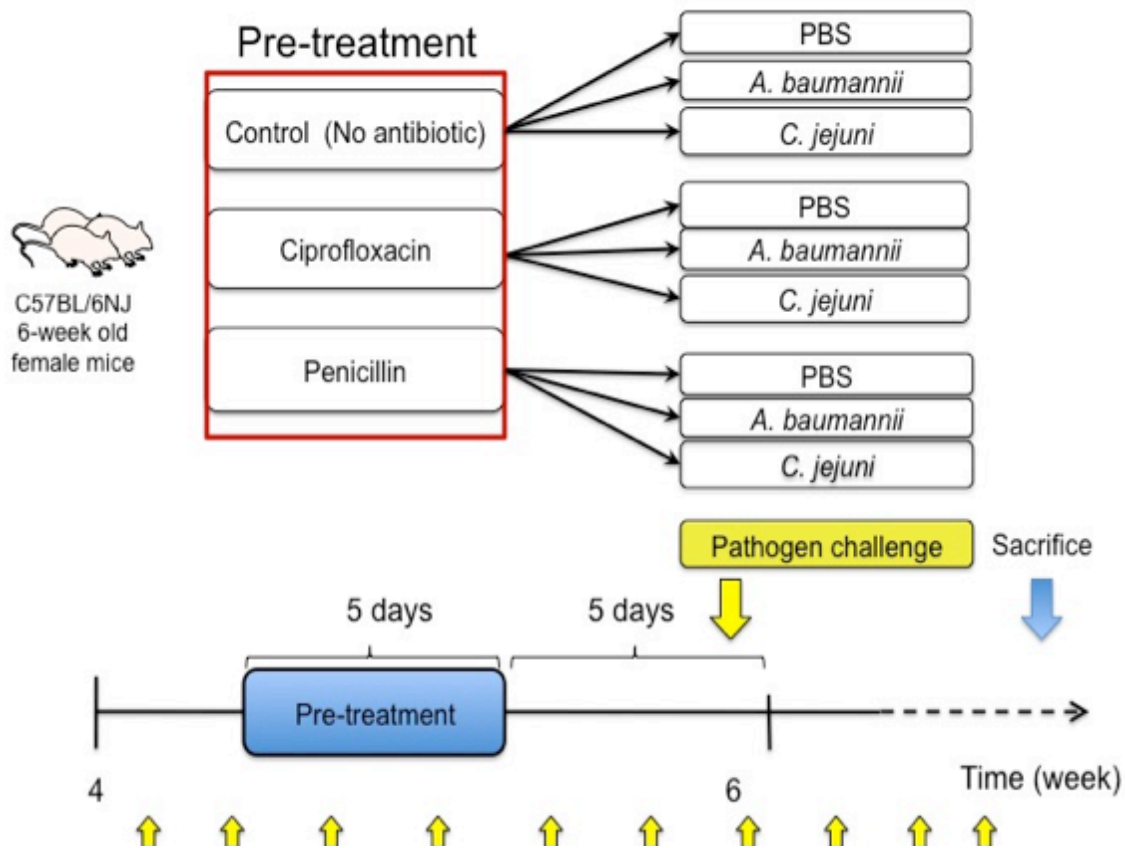

**Figure S2. Experimental design to determine the effect of prior antibiotic treatment on mouse colonization by *A. baumannii* or *C. jejuni*.**

Mice were given water containing penicillin VK, ciprofloxacin, or PBS for a 5 day period. Five days after the end of the antibiotic (or control) treatment, mice were inoculated with *A. baumannii*, *C. jejuni*, or with PBS as a control.

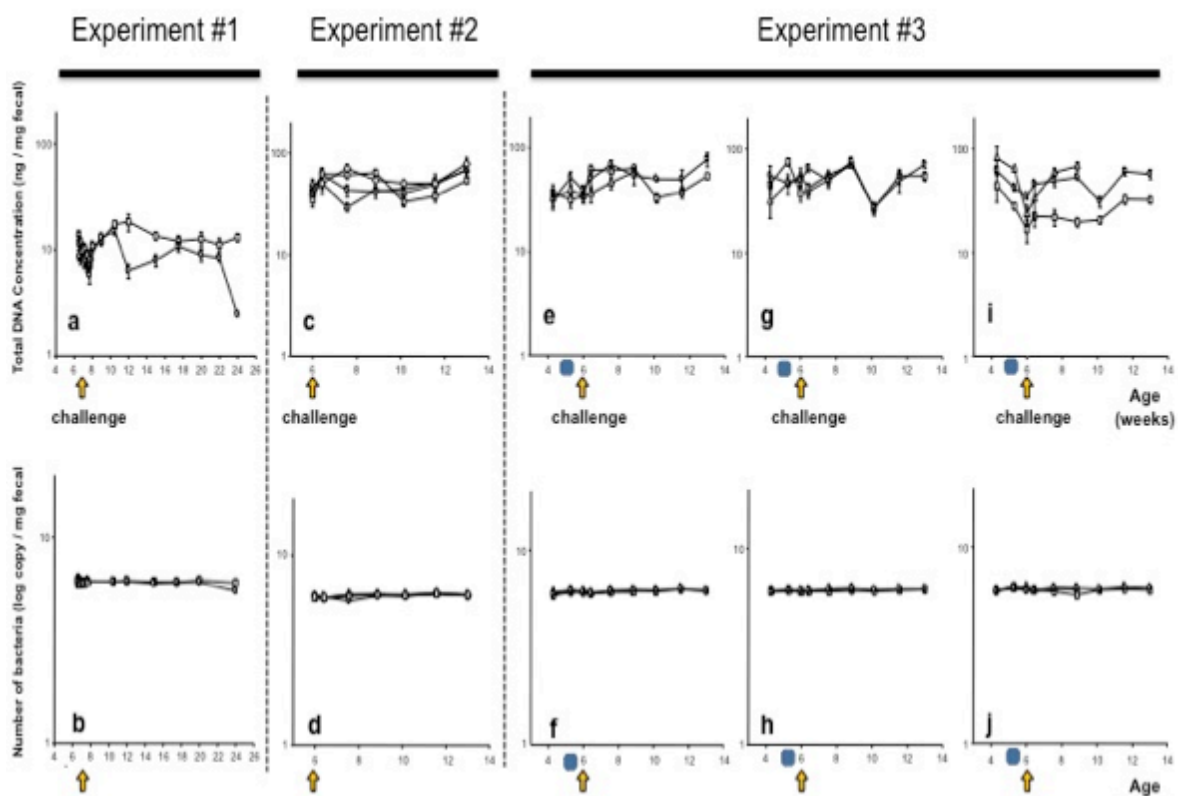

**Figure S3. Quantitation of total bacteria in fecal pellets.**

**Top panels.** Bacterial DNA concentration, determined by nanodrop. **Bottom panels.** Detection of total number of bacteria by qPCR. **Panels a and b.** Experiment #1. Mice received from Jackson Laboratories were inoculated with PBS (control), *C. jejuni* or *A. baumannii* at 7 weeks of age, with continuous follow-up until 24 weeks. **Panels c and d.** Experiment #2. Mice from NYU were inoculated with PBS (control) or with any of three strains of *C.jejuni* at 6 weeks of age, with continuous observation until 13 weeks. **Panels e to j.** Experiment #3. Challenge was performed in groups of 5 mice after receiving five days of either

PBS (**Panels e and f**), ciprofloxacin (**Panels g and h**), or penicillin (**Panels i and j**). The blue boxes indicate the period of exposure to antibiotics. Animals were challenged with *C. jejuni*, *A. baumannii*, or PBS (control). The arrows indicate the time of challenge.

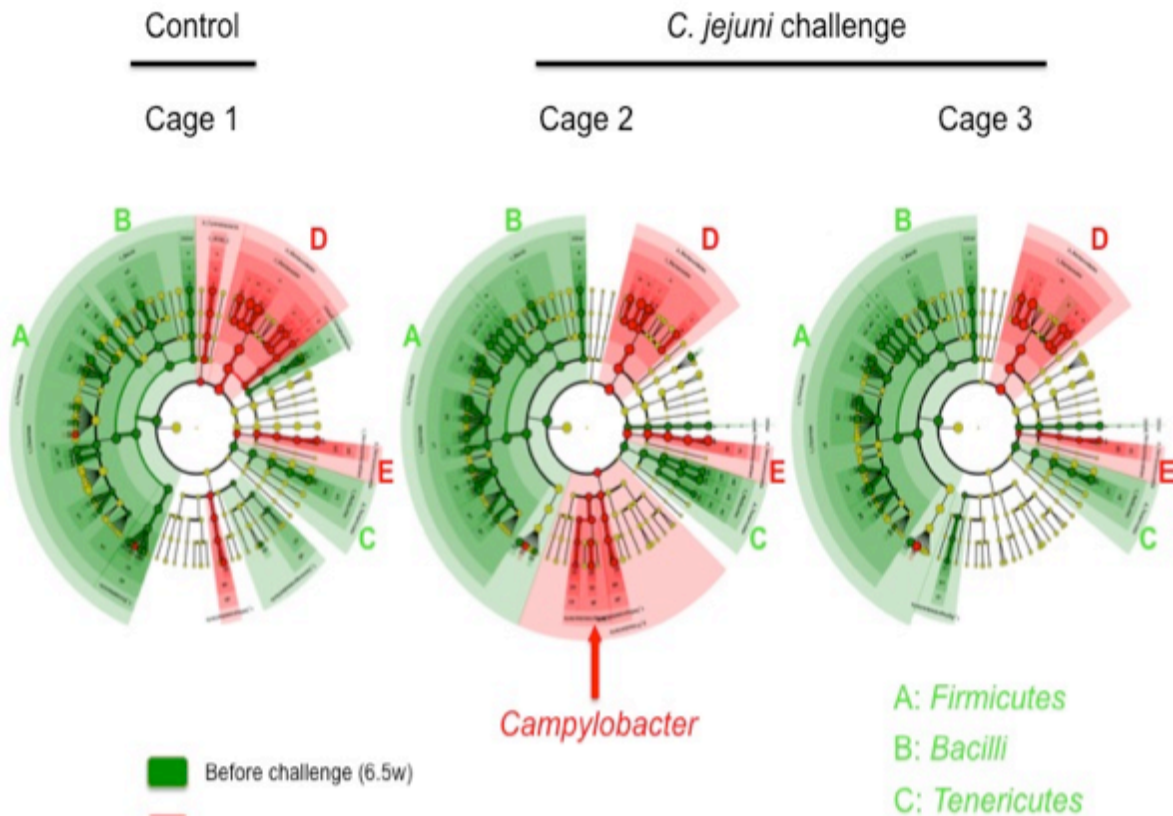

**Figure S4. Comparative analysis of relative abundance of specific taxa using LEfSe.** Relative abundance differences for mice in each cage at two time points: before challenge (6.5 weeks of age) and ~16 weeks after challenge (23.9 weeks of age). The cladograms show taxonomic representation of statistically significant differences over time, by cage. Each cladogram represents a cage as described in Figure 2. Colors: green represents bacterial taxa that were significantly more abundant before *C. jejuni* challenge; red represents taxa significantly increased at the end of the experiment, after the challenge.

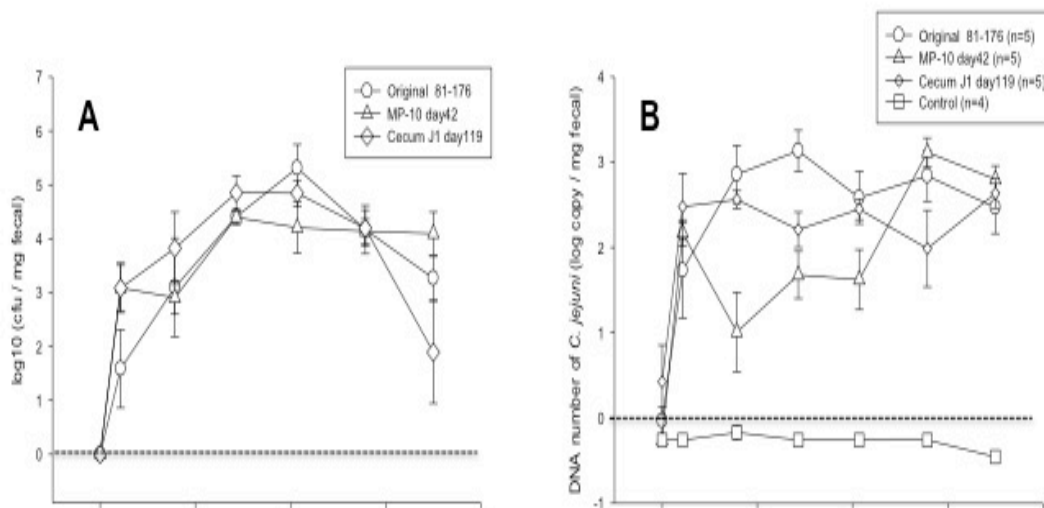

**Figure S5. Assessment of *C. jejuni* intestinal colonization after challenge.** To investigate colonization by mouse-passaged *C. jejuni* strains, mice were inoculated at 6 weeks of age with one of three different strains of *C. jejuni* or not (control). The arrow indicates time of challenge. Results of culture detection (**Panel A**) and qPCR (**Panel B**), are shown.

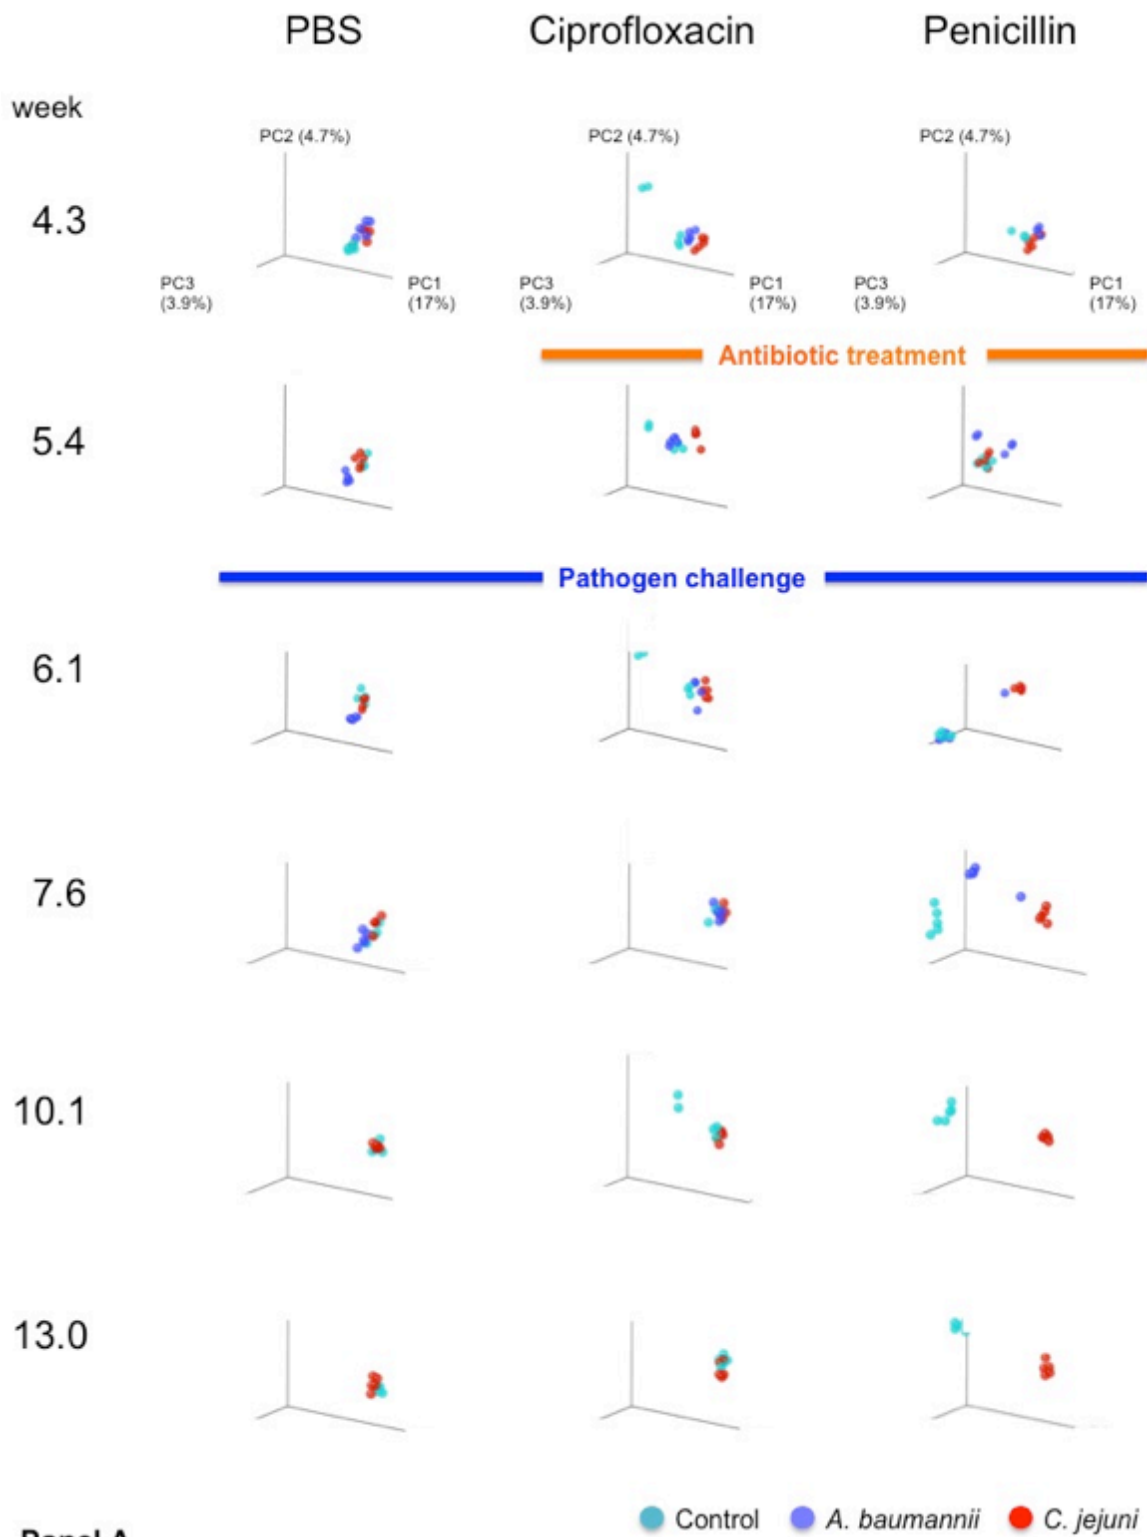

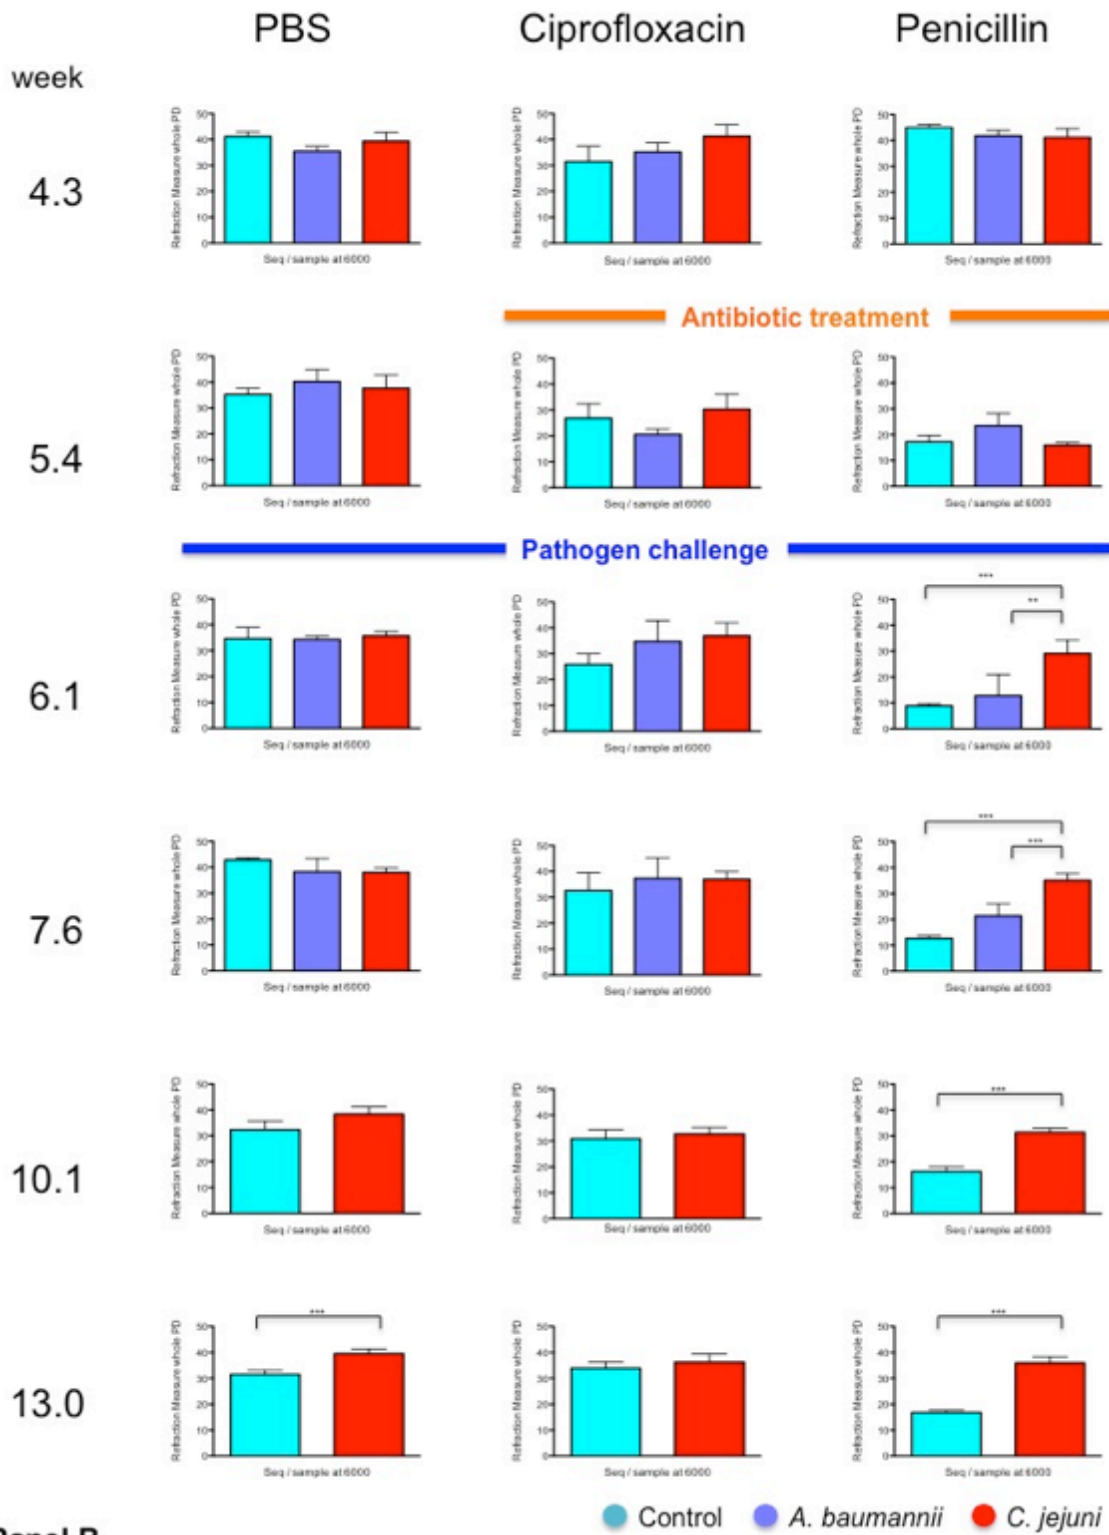



**Figure S6. Assessment of longitudinal changes in microbial diversity associated with antibiotic treatment and bacterial challenge.** Each row shows a different time point and each column indicates the treatment groups. The pathogen challenges are color-coded. Mice challenged with *A. baumannii* was studied only up to 7.6 weeks of age. **Panel A:** Beta-diversity. PCoA of the unweighted UniFrac distance of microbial 16S rRNA sequence (V4 region) in fecal samples is presented longitudinally from 4.3 to 13 weeks of age (Statistical analysis in **Supplement Figure 7.**). **Panel B:** alpha-diversity by whole PD metric associated with antibiotic treatment and bacterial challenge. Alpha-diversity was calculated using the whole PD evenness metric. \*  $p < 0.05$ , \*\*  $p < 0.01$ , \*\*\* $p < 0.001$ , by ANOVA.

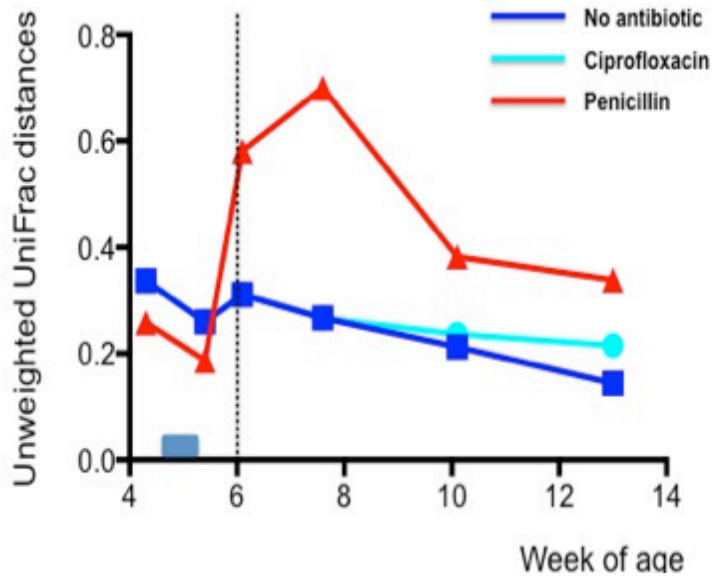

**Figure S7. Comparison of the inter-group phylogenetic distances over time.**

This figure indicates longitudinal changes in inter-group distances in beta diversity in mouse gut microbiota associated with *C. jejuni* challenge and antibiotic treatment. Unweighted Unifrac analysis of inter-group distance between mice challenged or not with *C. jejuni*, and treated or not with antibiotics is shown. The light blue line represents no antibiotics, dark blue is ciprofloxacin, and red is penicillin.
